# Supplementary material for: DNA Barcoding Evaluation and Its Taxonomic Implications in the Species-Rich Genus Primula L. in China
Source: PubMed Central journal article supplement (PMC4395239; doi:10.1371/journal.pone.0122903), 2015-04-13

rbcl

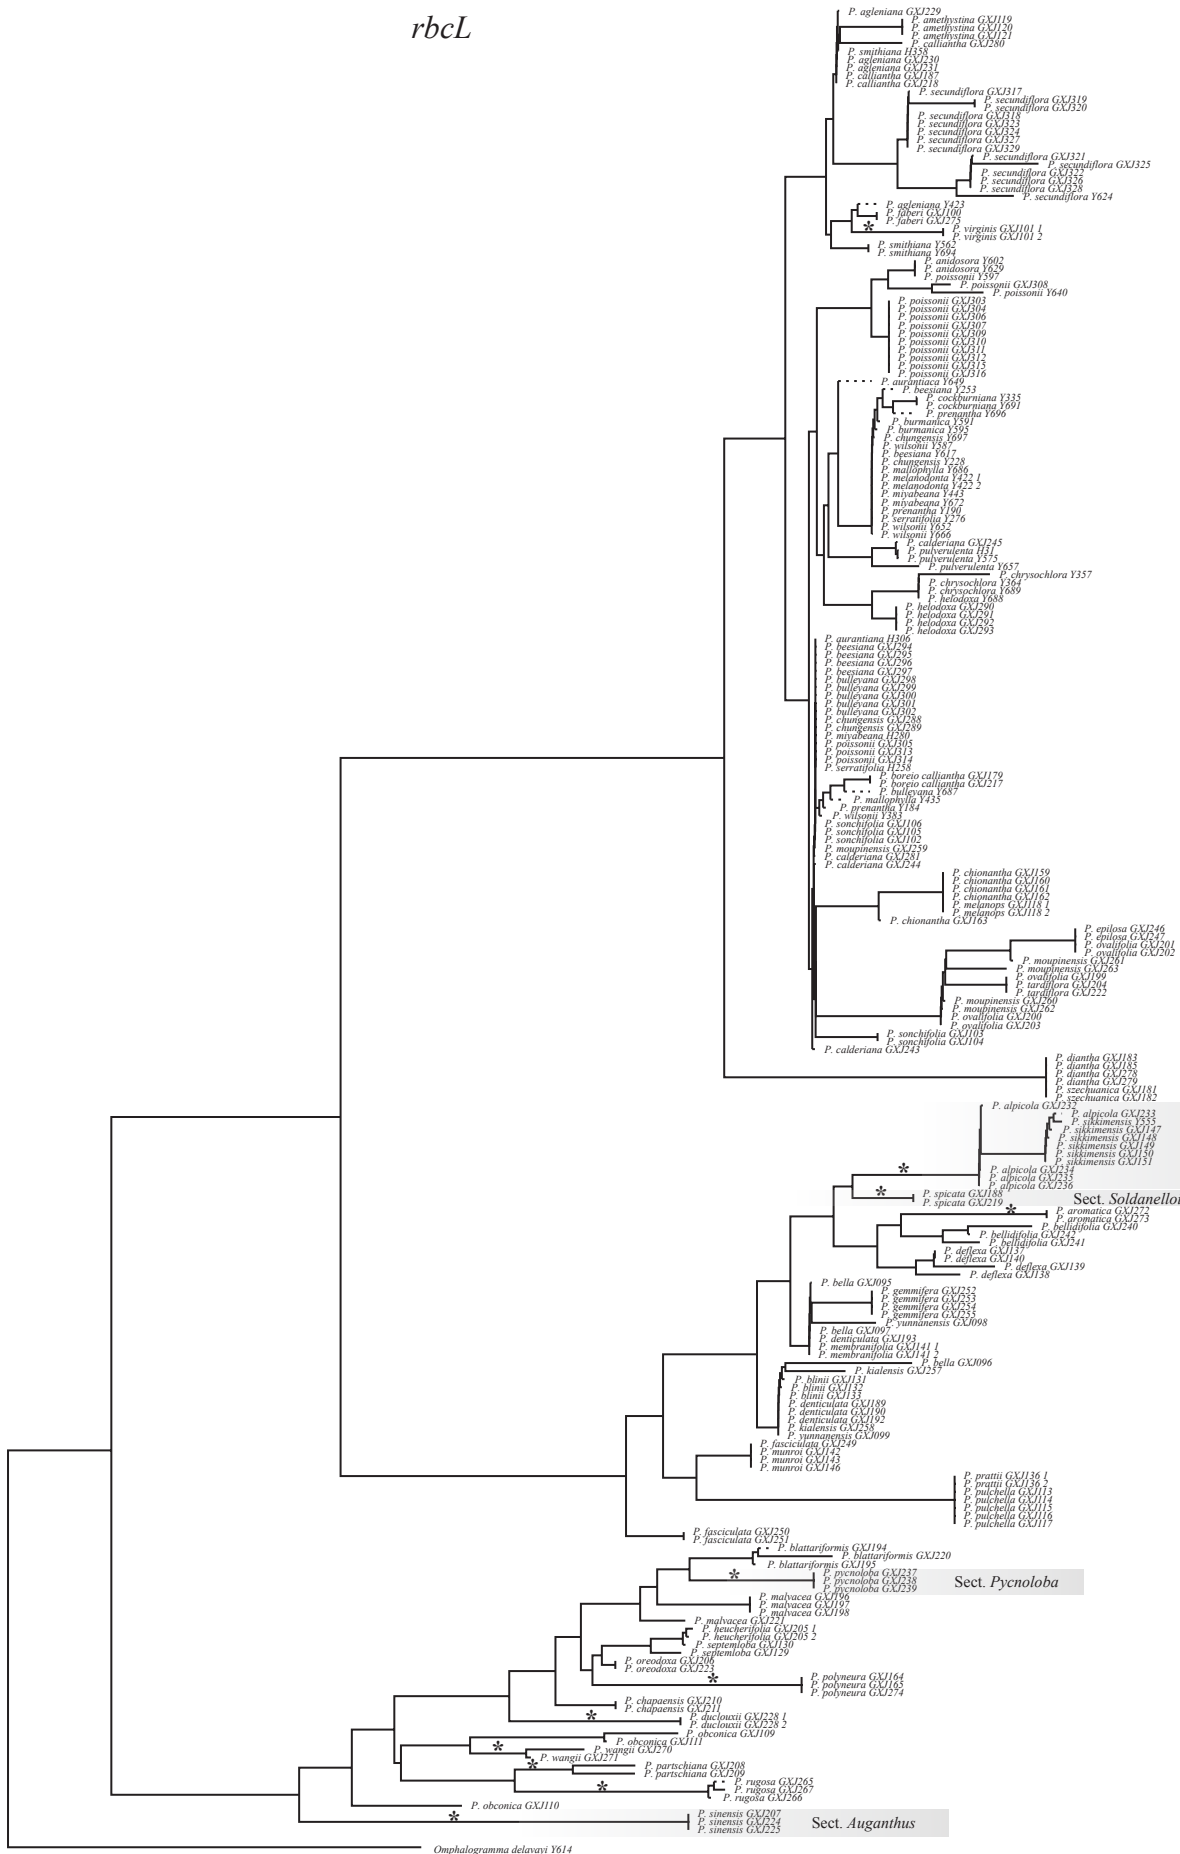

*Omphalogramma delavayi* 1614

— 0.0005 substitutions/site

matK

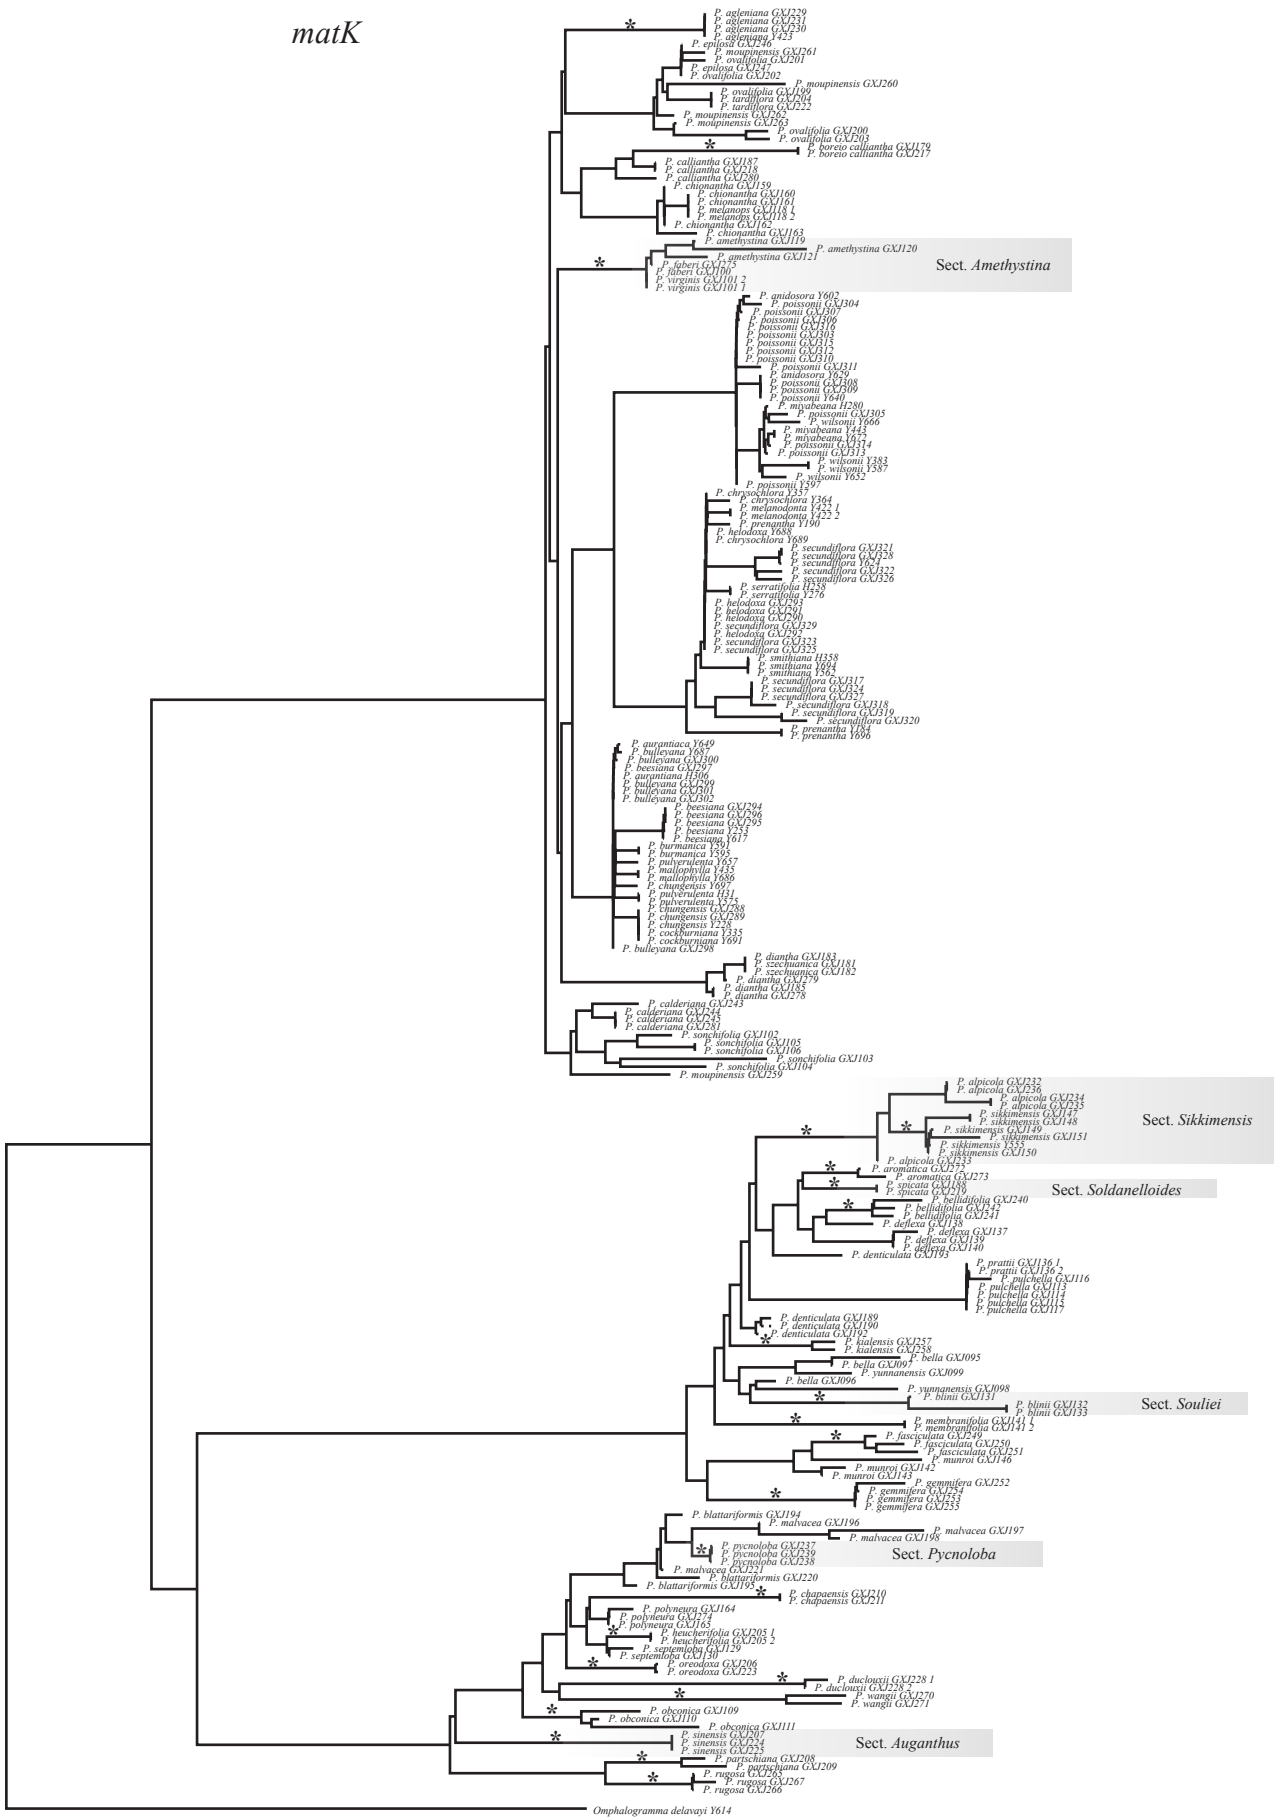

0.001 substitutions/site

*trnH-psbA*

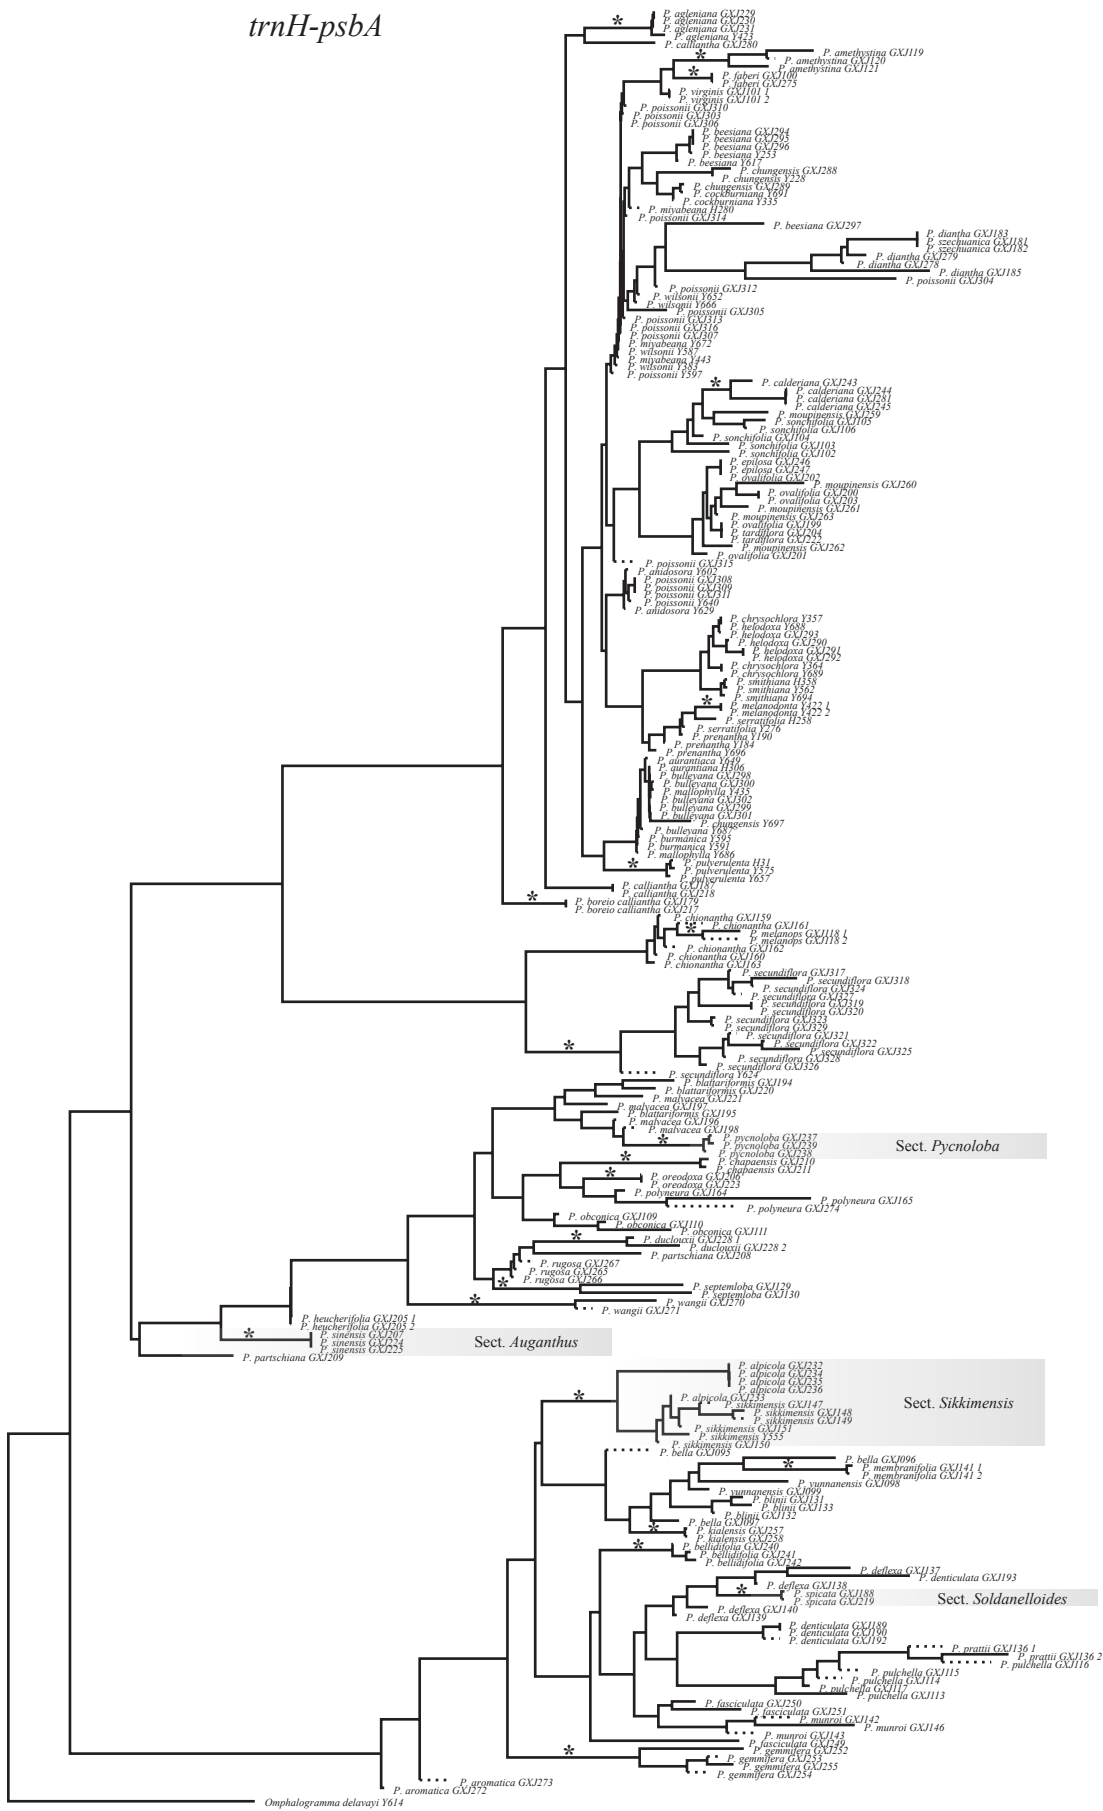

ITS

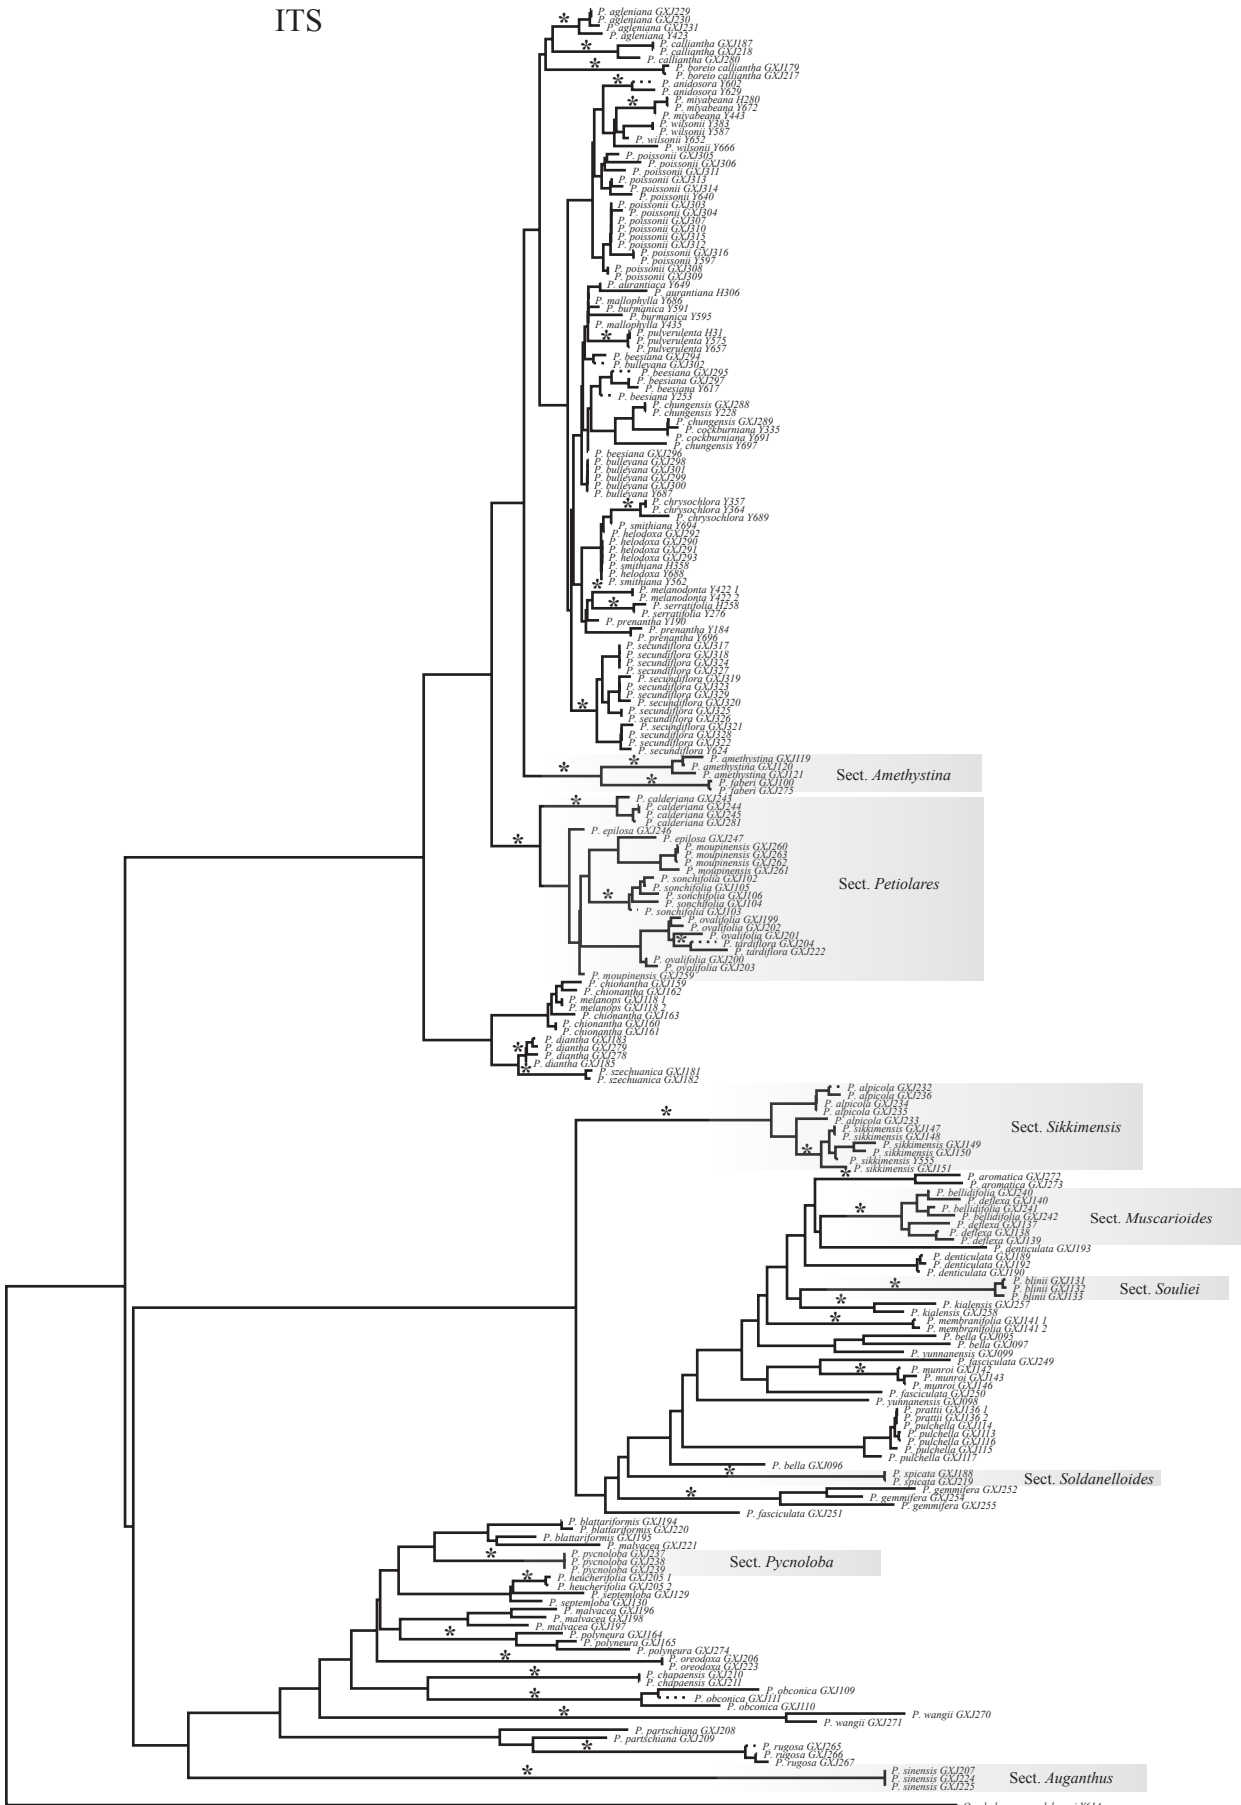

*Pterodroma delavayi* 1614

0.005 substitutions/site

*rbcL+matK*

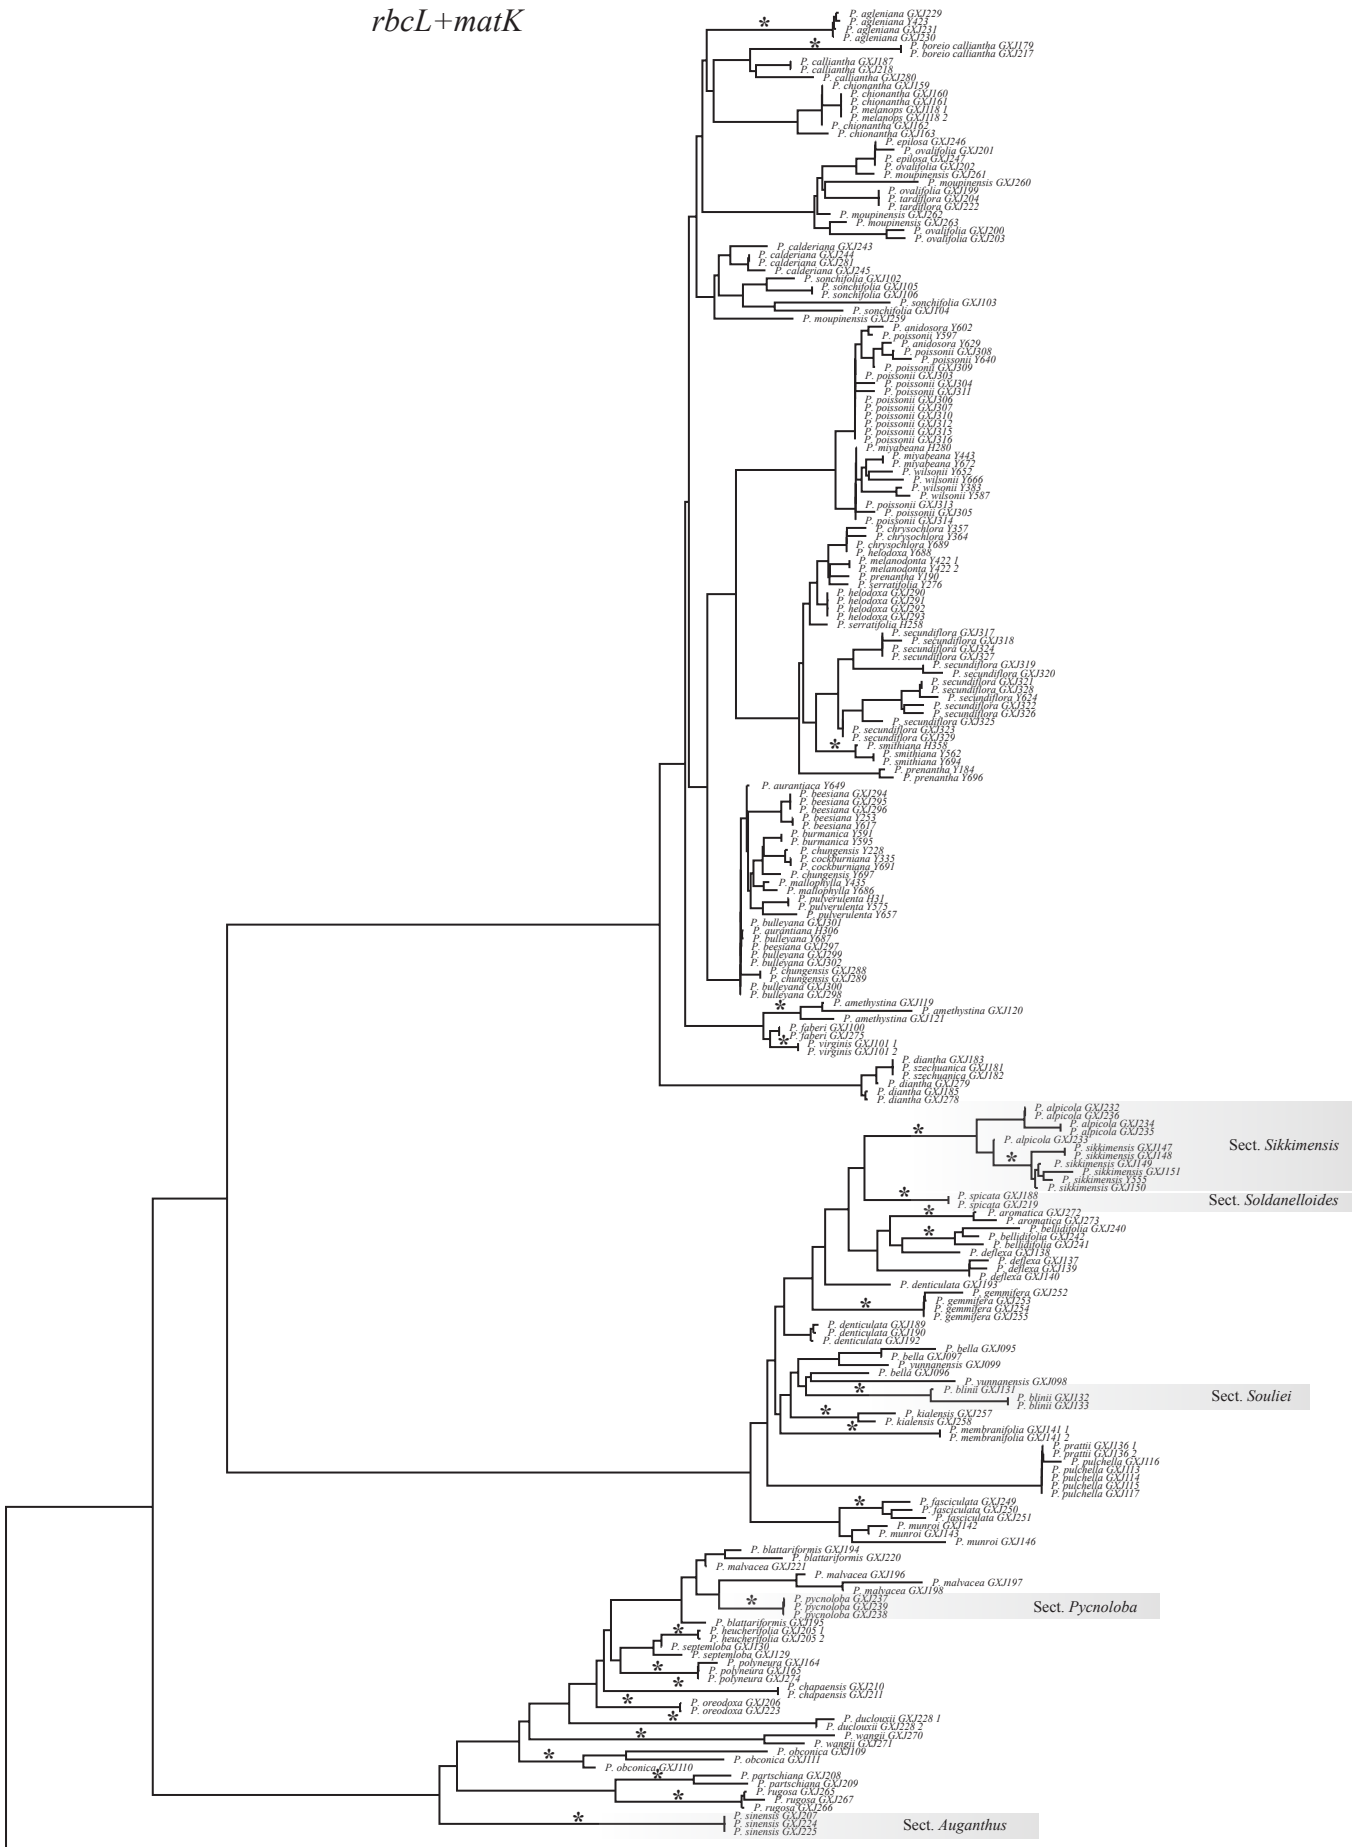

*Omphalogramma delavayi* Y614

— 0.001 substitutions/site

*rbcL+matK+trnH-psbA*

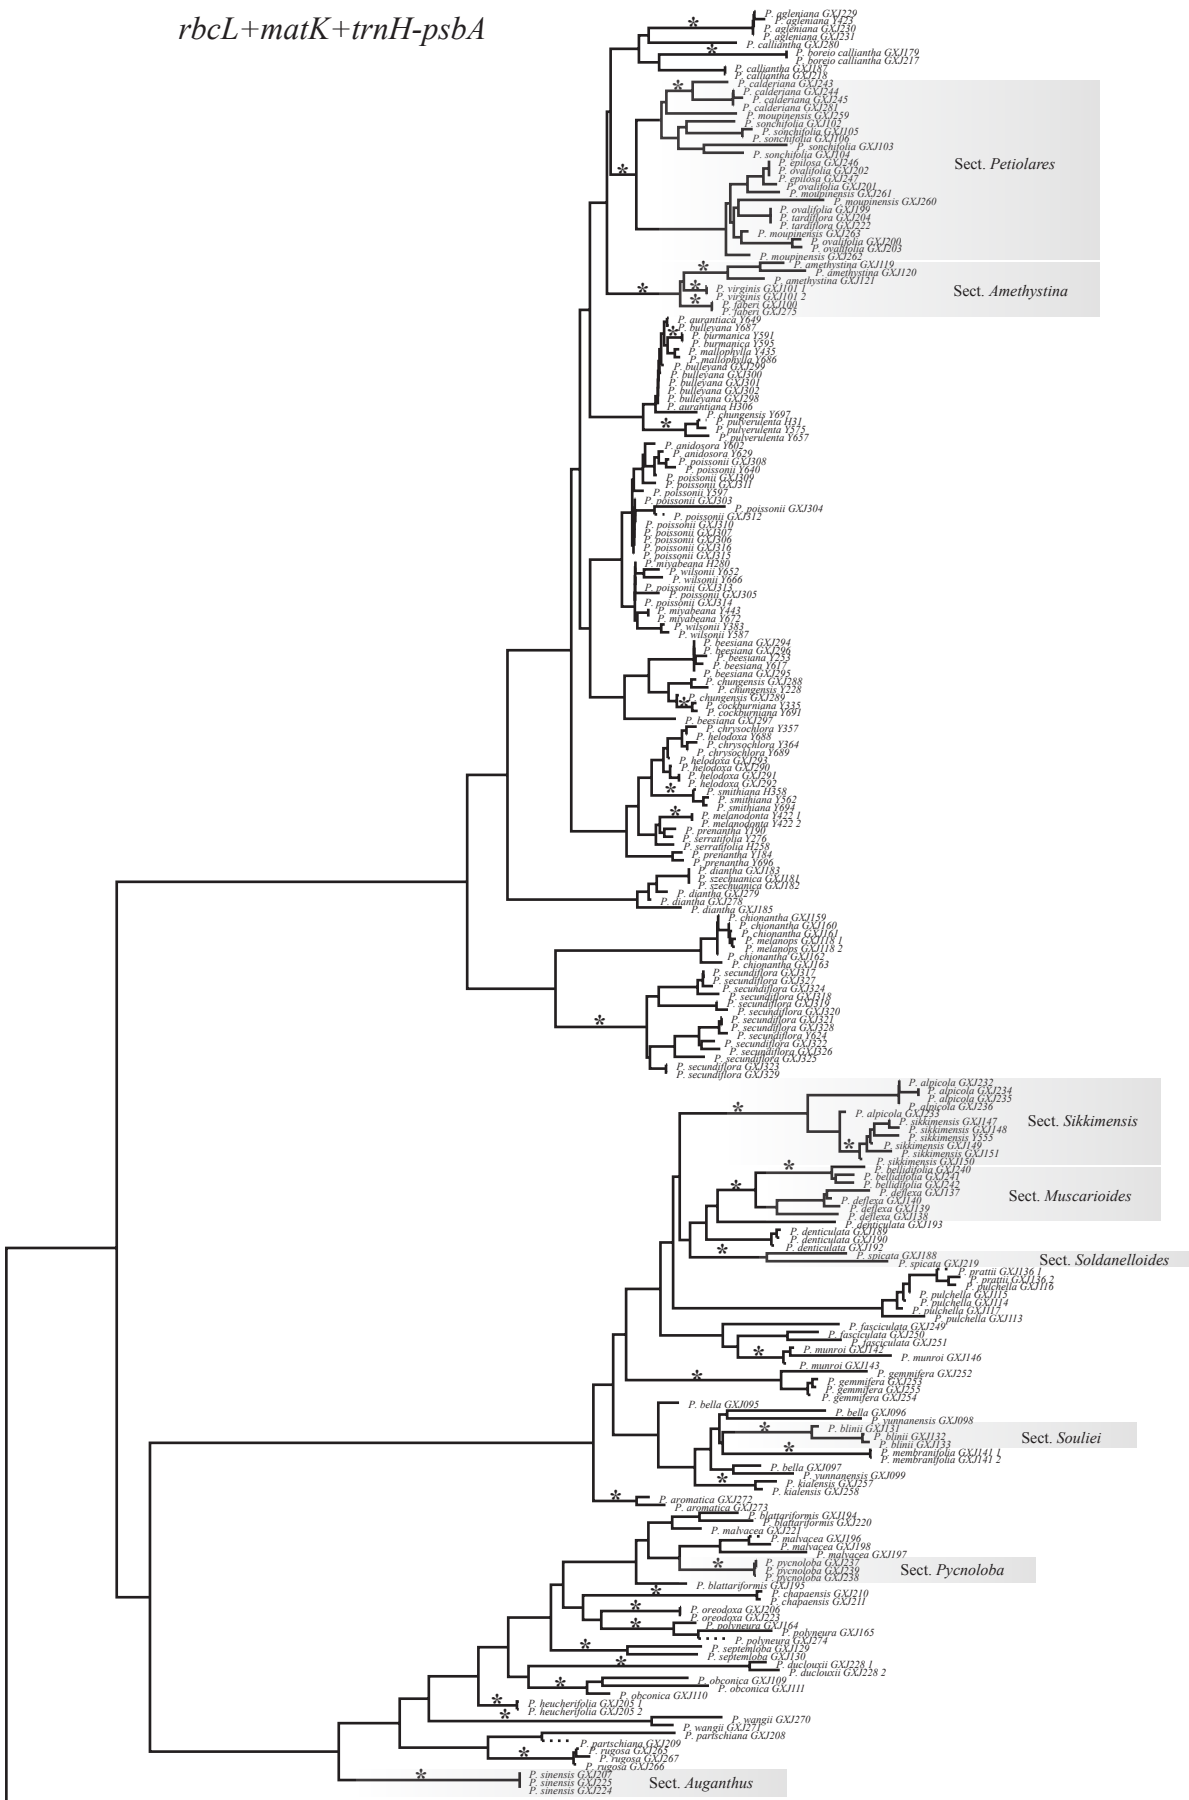

*Omphalogramma delavayi* 1614

— 0.001 substitutions/site

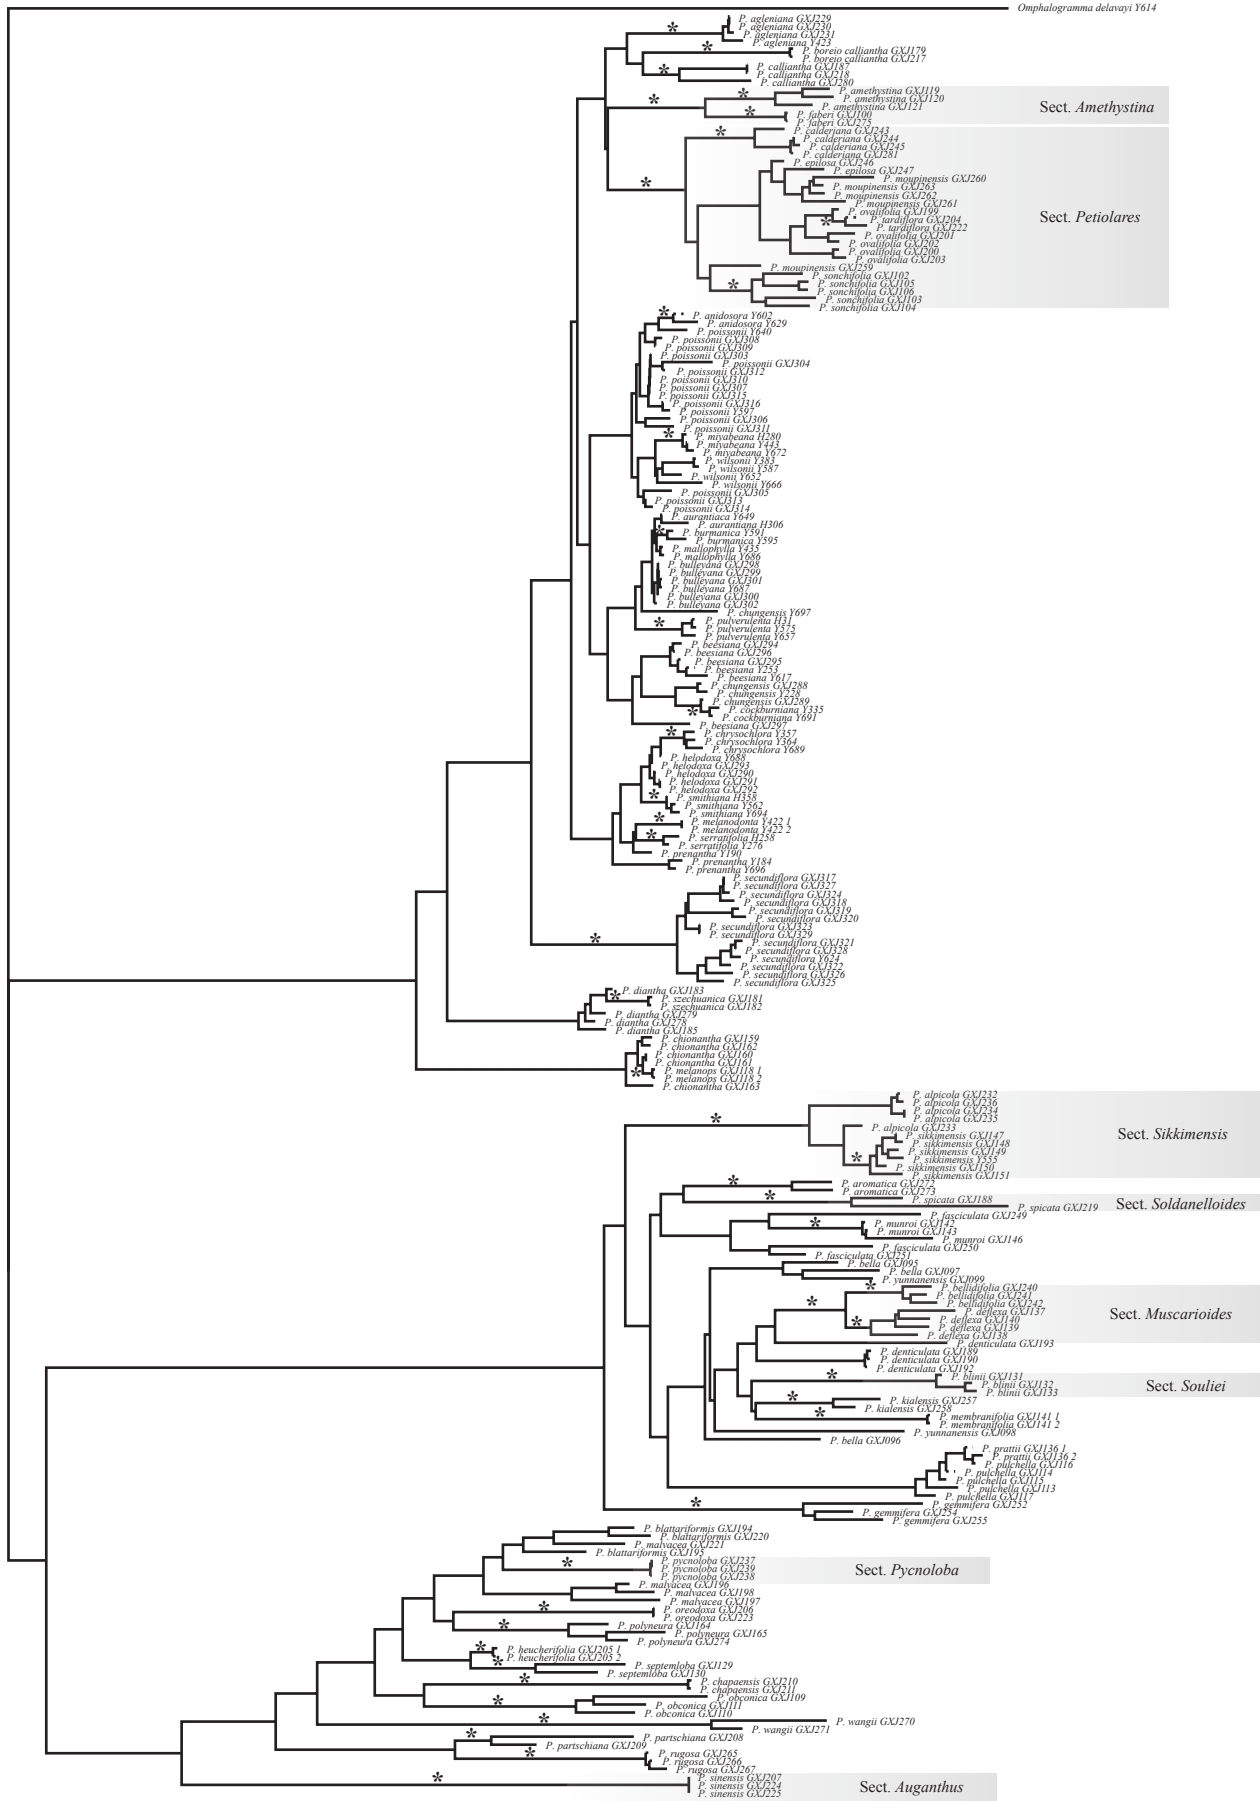

Supplement: pone.0122903.s001.pdf [file pone.0122903.s001.pdf]
